# Supplementary material
Source: PubMed Central journal article supplement (PMC7724525)

## Supplementary Material

Supplementary table 1. The international BUX-3 study group investigators

| <b>Centre</b>                                    | <b>Investigator</b> |
|--------------------------------------------------|---------------------|
| <b>Germany</b>                                   |                     |
| University Hospital Schleswig Holstein, Lübeck   | Klaus Fellermann    |
| EUGASTRO GmbH, Leipzig                           | Ingolf Schiefke     |
| <b>Hungary</b>                                   |                     |
| Petz Aladár County Hospital, Győr                | István Rácz         |
| Pannónia Magánorvosi Centrum Kft, Budapest       | Róbert Schnabel     |
| University of Szeged, Szeged                     | Ferenc Nagy         |
| Semmelweis University, Budapest                  | Zsolt Tulassay      |
| <b>Latvia</b>                                    |                     |
| Pauls Stradiņš University, Riga                  | Juris Pokrotnieks   |
| Riga East Clinical University Hospital, Riga     | Aleksejs Derovs     |
| Latvian Maritime Medical Centre, Riga            | Jelena Derova       |
| Daugavpils Regional Hospital, Daugavpils         | Glebs Delmans       |
| <b>Lithuania</b>                                 |                     |
| Lithuanian University of Health Sciences, Kaunas | Laimas Jonaitis     |

---

**Supplementary table 2. Independent ethics committee approvals of the protocol**

---

| <b>Independent ethics committees</b>                                                       | <b>Date of approval of protocol</b> |
|--------------------------------------------------------------------------------------------|-------------------------------------|
| Ethik-Kommission der Universität zu Lübeck, Lübeck, Germany                                | 26 May 2015                         |
| Egészségügyi Tudományos Tanács, Klinikai Farmakológiai Etikai Bizottság, Budapest, Hungary | 13 July 2015                        |
| Ethics Committee for Clinical Research at Paula Stradina University Hospital, Riga, Latvia | 01 July 2015                        |
| Lithuanian Bioethics Committee, Vilnius, Lithuania                                         | 08 September 2015                   |

---

### Supplementary table 3. Clinical Activity Index

CAI was calculated according to Rachmilewitz et al.<sup>13</sup> as the sum of the scores of seven variables:

| Variable                                       | Score |
|------------------------------------------------|-------|
| Number of stools, weekly <sup>a</sup>          |       |
| <18                                            | 0     |
| 18 to 35                                       | 1     |
| 36 to 60                                       | 2     |
| >60                                            | 3     |
| Blood in or on the stools, weekly <sup>a</sup> |       |
| 0 to 1 stools                                  | 0     |
| ≤30% of all stools                             | 2     |
| >30% of all stools                             | 4     |
| Abdominal pain/cramps, weekly <sup>a</sup>     |       |
| None (0–3 points)                              | 0     |
| Mild (4–10 points)                             | 1     |
| Moderate (11–17 points)                        | 2     |
| Severe (18–21 points)                          | 3     |
| General wellbeing, weekly <sup>a</sup>         |       |
| Good (0–3 points)                              | 0     |
| Average (4–10 points)                          | 1     |
| Poor (11–17 points)                            | 2     |

|                                                  |   |
|--------------------------------------------------|---|
| Very poor (18–21 points)                         | 3 |
| Temperature/fever as a result of UC <sup>b</sup> |   |
| ≤38 °C                                           | 0 |
| >38 °C                                           | 3 |
| Extraintestinal manifestations <sup>b</sup>      |   |
| None                                             | 0 |
| Iritis                                           | 3 |
| Erythema nodosum                                 | 3 |
| Arthritis                                        | 3 |
| Laboratory findings <sup>c</sup>                 |   |
| ESR ≤50 mm and Hb ≥100 g/L                       | 0 |
| ESR >50 mm, but ≤100 mm in first hour            | 1 |
| ESR >100 mm in first hour                        | 2 |
| Hb <100 g/L                                      | 4 |

---

The primary endpoint of clinical remission was defined as CAI ≤4, with stool frequency <18/week and the absence of rectal bleeding. Clinical improvement was defined as a decrease of ≥3 from baseline to Week 8. <sup>a</sup>Self-reported in patient diary. <sup>b</sup>Assessed via clinical examination. <sup>c</sup>ESR assessed at local laboratories, Hb assessed at the central laboratory. CAI, Clinical Activity Index; ESR, erythrocyte sedimentation rate; Hb, haemoglobin; UC, ulcerative colitis.

#### Supplementary table 4. Modified Disease Activity Index

mDAI was calculated according to Sutherland et al.<sup>14</sup> and Sandborn et al.<sup>15</sup> as the sum of the scores of four variables:

| Variable                                                                                                      | Score |
|---------------------------------------------------------------------------------------------------------------|-------|
| Number of stools, daily <sup>a</sup>                                                                          |       |
| Normal                                                                                                        | 0     |
| 1 to 2 more than normal                                                                                       | 1     |
| 3 to 4 more than normal                                                                                       | 2     |
| >4 more than normal                                                                                           | 3     |
| Rectal bleeding, weekly <sup>a</sup>                                                                          |       |
| None                                                                                                          | 0     |
| Streaks of blood                                                                                              | 1     |
| Obvious blood                                                                                                 | 2     |
| Mostly blood                                                                                                  | 3     |
| Mucosal appearance <sup>b, c</sup>                                                                            |       |
| Normal                                                                                                        | 0     |
| Erythema, decreased vascular pattern, minimal granularity                                                     | 1     |
| Marked erythema, friability, granularity, absent vascular pattern, bleeding on minimal trauma, no ulcerations | 2     |
| Ulceration, spontaneous bleeding                                                                              | 3     |
| Physician's rating of disease activity <sup>d</sup>                                                           |       |
| Normal                                                                                                        | 0     |

|          |   |
|----------|---|
| Mild     | 1 |
| Moderate | 2 |
| Severe   | 3 |

---

The secondary endpoint of clinical remission was defined as an mDAI stool frequency subscore of  $\leq 1$  and a rectal bleeding subscore of 0 at Week 8. <sup>a</sup>Self-reported in patient diary. <sup>b</sup>Assessed via endoscopy. <sup>c</sup>To increase stringency, patients showing any mucosal friability were assigned the mucosal appearance subscore of  $\geq 2$ . Friability was defined as contact bleeding. <sup>d</sup>Assessed via clinical examination. mDAI, modified Disease Activity Index.

### Supplementary table 5. Endoscopic Index

EI was calculated according to Rachmilewitz et al.<sup>13</sup> as the sum of the scores of four variables:

| Variable                                                  | Score |
|-----------------------------------------------------------|-------|
| Granulation scattering reflected light                    |       |
| No                                                        | 0     |
| Yes                                                       | 2     |
| Vascular pattern                                          |       |
| Normal                                                    | 0     |
| Faded/disturbed                                           | 1     |
| Completely absent                                         | 2     |
| Vulnerability of mucosa                                   |       |
| None                                                      | 0     |
| Slightly increased (contact bleeding)                     | 2     |
| Greatly increased (spontaneous bleeding)                  | 4     |
| Mucosal damage (mucus, fibrin, exudate, erosions, ulcers) |       |
| None                                                      | 0     |
| Slight (<10 ulcers/10 cm mucosa)                          | 2     |
| Pronounced (≥10 ulcers/10 cm mucosa)                      | 4     |

Endoscopic remission was defined as an EI score of <4. Endoscopic improvement was defined as an EI score decrease of ≥1 from baseline to Week 8. EI, Endoscopic Index.

### Supplementary table 6. Histological Index

HI was calculated according to Riley et al.<sup>16</sup> The severity (none [0], mild [1], moderate [2], severe [3]) of the following variables was assessed in a semi-quantitative way:

- Acute inflammatory cell infiltrate (polymorphonuclear neutrophil leucocytes in the lamina propria)
- Crypt abscesses
- Mucin depletion
- Surface epithelial integrity
- Chronic inflammatory cell infiltrate (round cells in the lamina propria)
- Crypt architectural irregularities

On this basis, the degree of mucosal inflammation was classified separately for the bowel segments biopsied and for the overall evaluation by the central pathologist using the following scale:

| Variable          | Score |
|-------------------|-------|
| No signs of UC    | 0     |
| Remission         | 1     |
| Mild activity     | 2     |
| Moderate activity | 3     |
| Severe activity   | 4     |

Histological remission was defined as an HI of  $\leq 1$ , which signifies a complete absence of neutrophils in the lamina propria and epithelium, no crypt abscesses, no mucin depletion, normal surface epithelial integrity, no or mild round cells in the lamina propria or epithelium, mild-to-moderate crypt architectural irregularities and no erosions or ulcers. Histological improvement was defined as a decreased HI of  $\geq 1$  from baseline scores of 2, 3 or 4 at Week 8. HI, Histological Index; UC, ulcerative colitis.



Supplementary Fig 1

A.

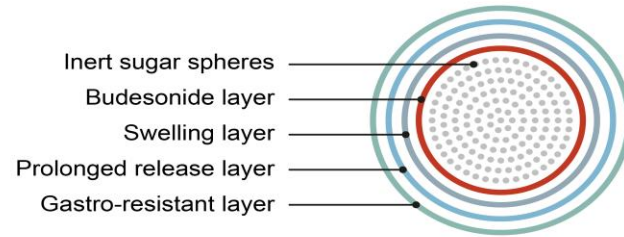

B.

**Step 1:** Disintegration of hard capsule containing 9 mg prolonged release budesonide granules

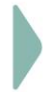

**Step 2:** Gastro-resistant layer dissolves at pH 6; intestinal fluid penetrates into the prolonged release budesonide granules

**Step 3:** Penetration by intestinal fluid leads to volume increase of the swelling layer

**Step 4:** Upon reaching the terminal ileum, the swelling layer dissolves and the internal pressure build-up creates cracks in the prolonged-release layer leading to a release of budesonide

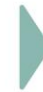

**Step 5:** Continuous release of budesonide across the colon

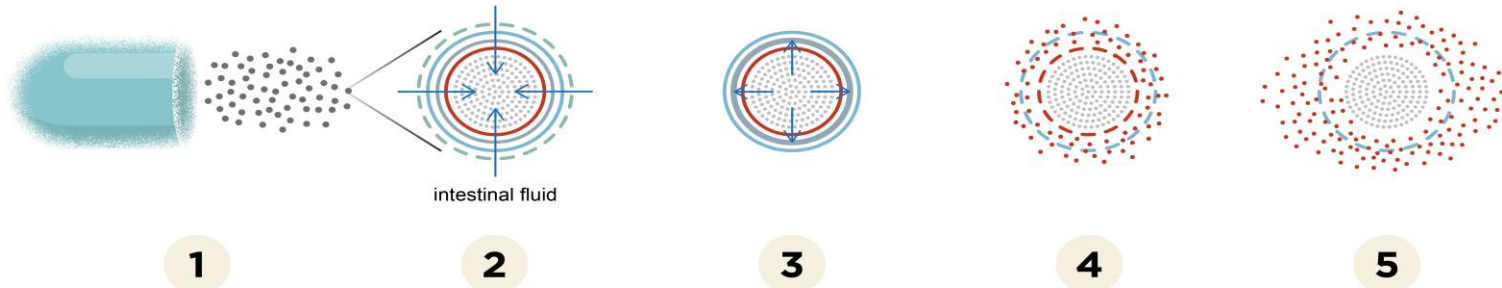

Supplementary Fig 2

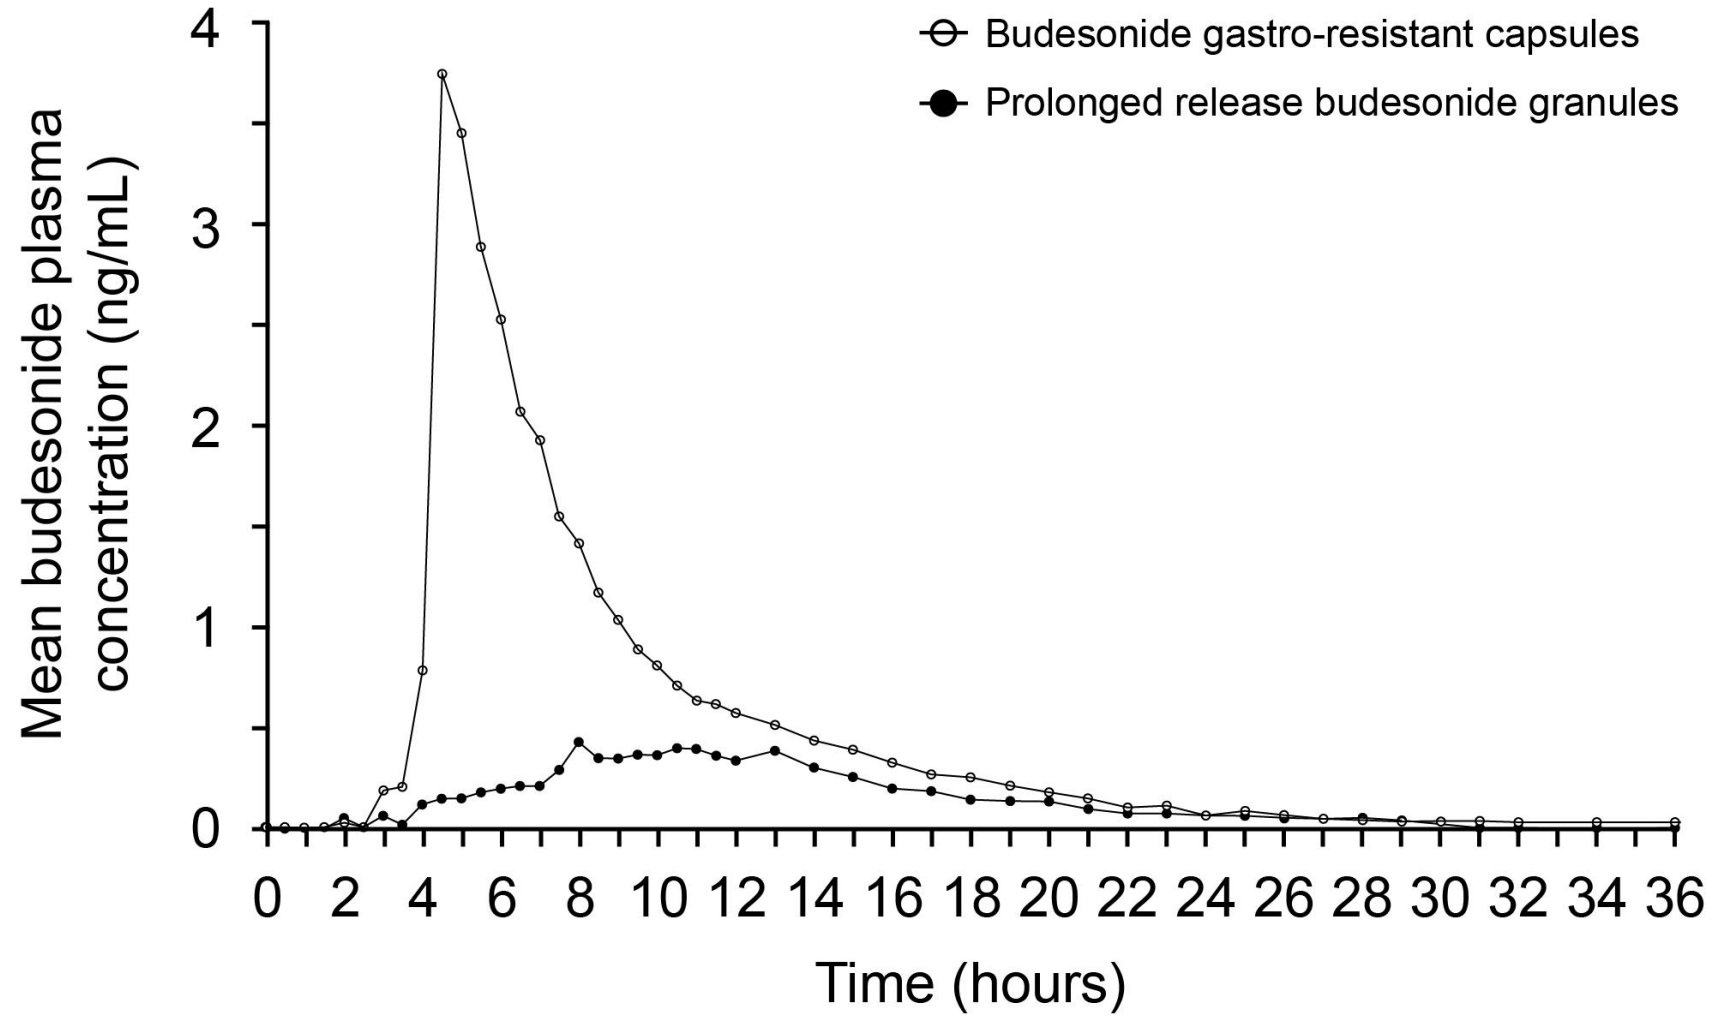

Supplement: sj-pdf-1-ueg-10.1177_2050640620962632.pdf [file sj-pdf-1-ueg-10.1177_2050640620962632.pdf]
